# Supplementary material for: Association of Health Care Factors With Excess Deaths Not Assigned to COVID-19 in the US
Source: PubMed Central journal article supplement (PMC8438594; doi:10.1001/jamanetworkopen.2021.25287), 2021-09-13
Supplement: jamanetwopen-e2125287-s001.pdf [file jamanetwopen-e2125287-s001.pdf]

## Supplemental Online Content

Stokes AC, Lundberg DJ, Bor J, Elo IT, Hempstead K, Preston SH. Association of health care factors with excess deaths not assigned to COVID-19 in the US. *JAMA Netw Open*. 2021;4(9):e2125287. doi:10.1001/jamanetworkopen.2021.25287

### **eMethods.**

This supplemental material has been provided by the authors to give readers additional information about their work.

## eMethods.

### Model Specification

We modeled all-cause mortality in 2020 as a function of historical all-cause mortality, directly assigned Covid-19 mortality in 2020, and an error term using Ordinary Least Squares regression with county units weighted by their estimated population in 2020:

$$M(i) = \alpha + \beta_1 M^*(i) + \beta_2 C(i) + \varepsilon, \text{ where}$$

$M(i)$  = Death rate from all causes in county  $i$  in 2020

$M^*(i)$  = Average death rate from all causes, county  $i$  in 2013-2018

$C(i)$  = Covid-19 death rate in county  $i$  in 2020

$\alpha$  = Changes in mortality that are independent of Covid-19 and common across regions

$\beta_1$  = Represents the extent to which past levels of all-cause mortality in a county are replicated in 2020

$\beta_2$  = Represents the extent to which mortality from Covid-19 affects all-cause mortality in 2020 after adjusting for historical mortality patterns

$\varepsilon$  = Error term

#### Interpretation of Coefficients:

1. Combinations of  $\alpha$  and  $\beta_1$  indicate how mortality changes that are not associated with Covid-19 vary with the level of all-cause mortality in 2013-18. If  $\beta_1 = 1.0$ , this would indicate that all-cause mortality in 2020 was on average equal to that in 2013-18, plus or minus the value of  $\alpha$ .
2.  $\beta_2$  reflects the number of excess deaths that occurred for every 1 directly assigned Covid-19 death. For example, if  $\beta_2$  were equal to 1.34, this means that for every 1 directly assigned Covid-19 death that occurred, 0.34 excess deaths occurred that were not assigned to Covid-19. If  $\beta_2$  were less than 1, this would mean that Covid-19 is over-recorded as a cause of death or reductions in mortality occurred for other causes.

#### Stratification of the Model:

To examine whether characteristics at the county or state-level (health care factors) were associated with having a higher percentage of excess deaths not assigned to Covid-19, we fully stratified our model and compared the  $\beta_2$  coefficient across strata. For continuous measures, factors were divided into population weighted quartiles, and we compared the upper and lower 25% of values.

## Formulas

### Formula for Calculating the Percent of Excess Deaths Not Assigned to Covid-19:

We calculated the percent of excess deaths not assigned to Covid-19 for each stratum using the  $\beta_2$  coefficient produced by our stratified models. The formula was as follows:

$$\text{Percent of Excess Deaths Not Assigned to Covid-19} = (\beta_2 \text{ Coefficient} - 1) / \beta_2 \text{ Coefficient}$$

For instance, in counties that had a higher percentage uninsured, the  $\beta_2$  Coefficient was 1.36. This indicates that 1.36 excess deaths occurred for every 1 directly assigned Covid-19 deaths, suggesting that 0.36 out of 1.36 excess deaths were not assigned to Covid-19.

$$\text{Percent of Excess Deaths Not Assigned to Covid-19} = (1.36 - 1) / 1.36 = 0.36 / 1.36 = 26\%$$

This implies that 26% of excess deaths were not assigned to Covid-19 in these counties.

### Formula for Predicting Excess Deaths Not Assigned to Covid-19:

We determined the average observed directly assigned Covid-19 death rate for each stratum by calculating the weighted mean of observed directly assigned Covid-19 mortality. We then predicted the excess death rate not assigned to Covid-19 using the  $\beta_2$  coefficient as follows:

$$\text{Excess Death Rate Not Assigned to Covid-19} = \text{Mean Directly Assigned Covid-19 Rate} \cdot (\beta_2 \text{ Coefficient} - 1)$$

## Data Sources

### Health Care Factors:

| Variable:                                                                                | Data Source:                                                                                                                                                                                                                                                            |
|------------------------------------------------------------------------------------------|-------------------------------------------------------------------------------------------------------------------------------------------------------------------------------------------------------------------------------------------------------------------------|
| % Uninsured                                                                              | <a href="https://www.countyhealthrankings.org/explore-health-rankings/rankings-data-documentation">https://www.countyhealthrankings.org/explore-health-rankings/rankings-data-documentation</a>                                                                         |
| Primary Care Physicians per Capita                                                       | <a href="https://www.countyhealthrankings.org/explore-health-rankings/rankings-data-documentation">https://www.countyhealthrankings.org/explore-health-rankings/rankings-data-documentation</a>                                                                         |
| Number of Hospital Beds per Capita                                                       | <a href="https://carlsonschool.umn.edu/mili-misrc-covid19-tracking-project">https://carlsonschool.umn.edu/mili-misrc-covid19-tracking-project</a>                                                                                                                       |
| Preventable Hospital Stays per Medicare Enrollee                                         | <a href="https://www.countyhealthrankings.org/explore-health-rankings/rankings-data-documentation">https://www.countyhealthrankings.org/explore-health-rankings/rankings-data-documentation</a>                                                                         |
| % of All-Cause Deaths Occurring at Home, 2013-2018                                       | <a href="https://wonder.cdc.gov/ucd-icd10.html">https://wonder.cdc.gov/ucd-icd10.html</a>                                                                                                                                                                               |
| % of All-Cause Deaths Occurring in Inpatient Settings, 2013-2018                         | <a href="https://wonder.cdc.gov/ucd-icd10.html">https://wonder.cdc.gov/ucd-icd10.html</a>                                                                                                                                                                               |
| % of All-Cause Deaths Occurring at Nursing Homes or Long-Term Care Facilities, 2013-2018 | <a href="https://wonder.cdc.gov/ucd-icd10.html">https://wonder.cdc.gov/ucd-icd10.html</a>                                                                                                                                                                               |
| Presence of a State & County Medical Examiner                                            | <a href="https://www.cdc.gov/phlp/publications/coroner/death.html">https://www.cdc.gov/phlp/publications/coroner/death.html</a><br>(Classifies states as having a state medical examiner or not)<br>Data on coroners scraped from publicly available state/county sites |

### Mortality and Population Data:

| Variable:                                                                                                               | Data Source:                                                                                                                                                                                    |
|-------------------------------------------------------------------------------------------------------------------------|-------------------------------------------------------------------------------------------------------------------------------------------------------------------------------------------------|
| All-Cause and Covid-19 Deaths in a County from January 1 to December 31, 2020 (Reported by March 12, 2021) <sup>a</sup> | <a href="https://data.cdc.gov/NCHS/AH-County-of-Residence-Provisional-COVID-19-Deaths/75vb-d79q">https://data.cdc.gov/NCHS/AH-County-of-Residence-Provisional-COVID-19-Deaths/75vb-d79q</a>     |
| All-Cause Deaths in a County from January 1 to December 31, 2013-2018                                                   | <a href="https://wonder.cdc.gov/ucd-icd10.html">https://wonder.cdc.gov/ucd-icd10.html</a>                                                                                                       |
| County Population Estimates, 2013-2018                                                                                  | <a href="https://www.census.gov/data/datasets/time-series/demo/popest/2010s-counties-total.html?#">https://www.census.gov/data/datasets/time-series/demo/popest/2010s-counties-total.html?#</a> |
| County Population Estimates, 2020                                                                                       | Special request from the U.S. Census Bureau                                                                                                                                                     |

Sample Exclusion Criteria:

- Counties in the NCHS Database with Covid-19 and All-Cause Mortality Data for 2020 (n=3,140)
- Excluded Counties Missing All-Cause Mortality Data for 2013-2018 (n=2)
- Limited to Counties with 20+ Covid-19 Deaths (n=1,042)
- Final County Analytic Sample<sup>b</sup> (n=2,096)

a. To account for possible lags in mortality reporting, we used data generated on March 12, 2021 (ten weeks after the end date), meaning that all deaths occurring before December 31, 2020 that were reported before March 12, 2021 were captured. Prior analyses of NCHS provisional data have found that provisional mortality data can have low completeness in the first month after a death occurs but are more than 75% complete within 8 weeks after a death.

b. Counties had complete data for each of the characteristics we examined.
